# Supplementary material for: Regioselective alkylation of 1,2,4-triazole using ionic liquids under microwave conditions
Source: publisher site journal article supplement (doi:10.1515/gps-2015-0138), 2016-04-08
Supplement: Supplementary file 2 [file gps-2015-0138_suppl.docx]

**Supplemental material**

**Regioselective alkylation of 1,2,4-triazole using ionic liquids under microwave conditions**

Ramandeep Kaur, Bhupinder Kumar, Ashish Ranjan Dwivedi and Vinod Kumar

DOI: 10.1515/gps-2015-0138

**ALKYLATION OF 1,2,4-TRIAZOLE DERIVATIVES**

**GENERAL PROCEDURE**

**General procedure for the synthesis of alkylated 1,2,4-triazole**: 1,2,4-triazole (4.3 mmol, 300 mg), potassium carbonate (6.5 mmol, 900 mg) was added in ionic liquid (0.5 mL) and the reaction mixture was kept in ice bath for 10 min. Thereafter butyl bromide (4.3 mmol, 594.7 mg)/ pentyl bromide (4.3 mmol, 655.5 mg) /hexyl bromide (4.3 mmol, 716.4 mg)/ octyl bromide (4.3 mmol, 831.2 mg)/ decyl bromide (4.3 mmol, 959.9 mg)/ allyl bromide (4.3 mmol, 525 mg)/ benzyl bromide (4.3 mmol, 742.3 mg) was added drop-wise to the reaction mixture and reaction mixture was irradiated to microwave for 10 min at 110oC. The reaction was monitored via TLC and after completion of reaction the reaction mixture was extracted with diethylether (3x20 mL). The combined organic layer was washed with water, brine and dried over sodium sulphate and solvent was evaporated under reduced pressure to obtained pure product in most of the cases.

**SPECTRAL DATA OF DIFFERENT 1-ALKYL-1,2,4-TRIAZOLE**[**8**](#_ENREF_8)**,** [**12**](#_ENREF_12)**,** [**24-27**](#_ENREF_24)

**1HNMR AND 13C NMR SPECTRA OF SYNTHESISED COMPOUNDS**

**1H NMR Spectra**

**13C NMR Spectra**

**1H NMR Spectra**

**13C NMR Spectra**

**1H NMR Spectra**

**13C NMR Spectra**

**1H NMR Spectra**

**13C NMR Spectra**

**1H NMR Spectra**

**13C NMR Spectra**

**1H NMR Spectra**

**13C NMR Spectra**

**1H NMR Spectra**

**13C NMR Spectra**

**1H NMR and C-13 Spectra of Ionic liquids**

**1H NMR Spectra of 1-Hexyl-3-methylimidazolium bromide**

**13C NMR Spectra of 1-Hexyl-3-methylimidazolium bromide**

**1H NMR Spectra of 1-Butyl-3-methylimidazolium bromide**

**13C NMR Spectra of 1-Butyl-3-methylimidazolium bromide**

**1H NMR Spectra of 1- Butylpyridinium bromide**

**13C NMR Spectra of 1- Butylpyridinium bromide**

**1H NMR Spectra of 1- Hexylpyridinium bromide**

**13C NMR Spectra of 1- Hexylpyridinium bromide**
